# Supplementary material for: Relief Modeling in the Restoration of Extractive Activities Using Drone Imagery
Source: MDPI journal article supplement (doi:10.3390/s23042097), 2023-02-13
Supplement: s1 [file s1]

## Supplementary Materials

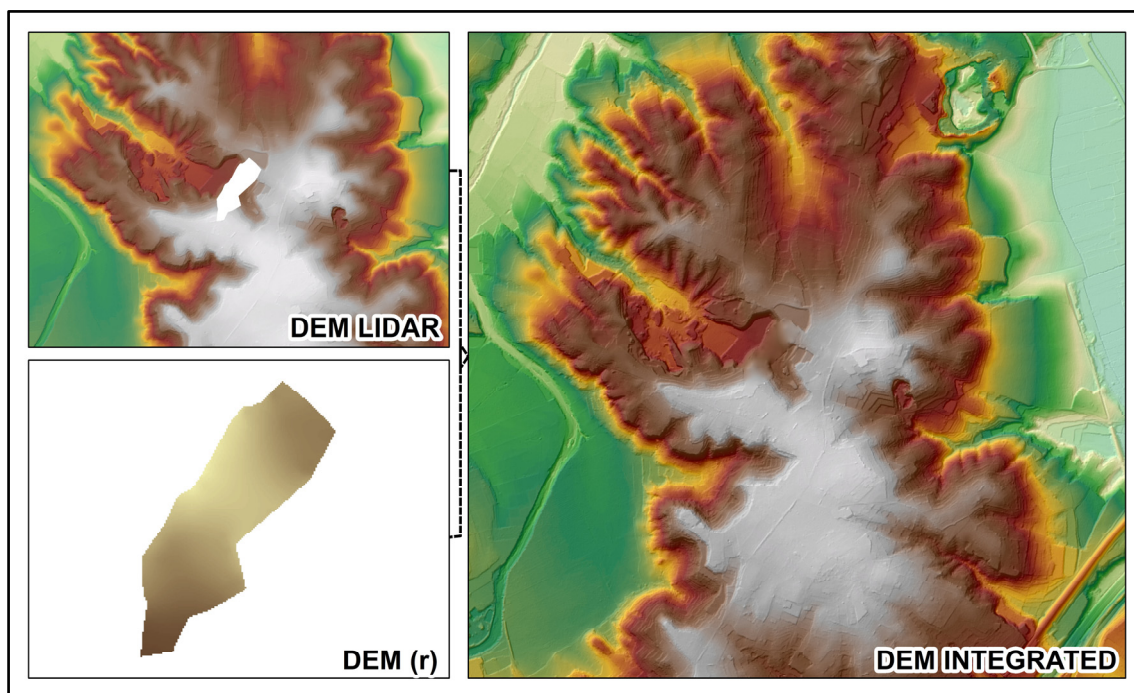

**Figure S1.** Integration of DEM-LIDAR and DEM (r).

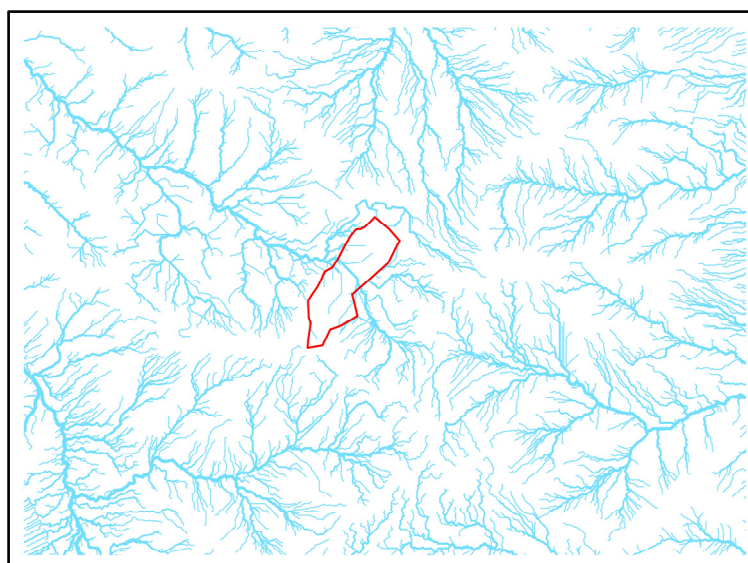

**Figure S2.** Reclassified raster with flow accumulation values  $> 50$  and null values.

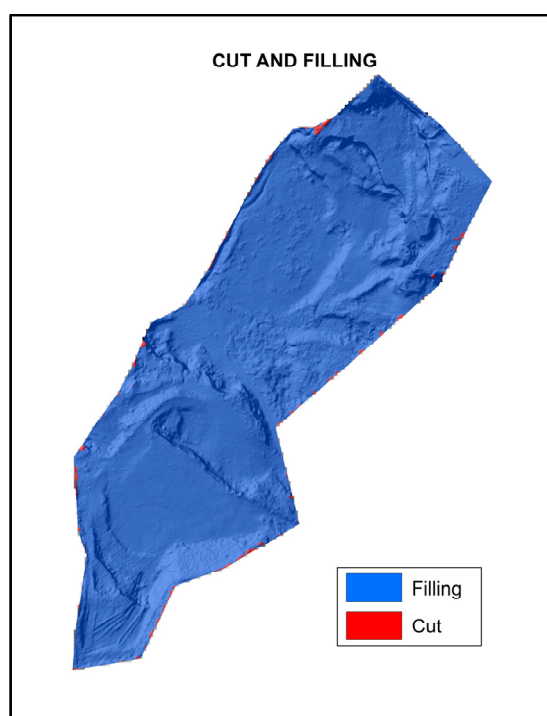

**Figure S3.** Classification of raster in cut and filling categories.
